# Supplementary material
Source: PubMed Central journal article supplement (PMC3907948)
Supplement: NIHMS546777-supplement-1.pdf [file NIHMS546777-supplement-1.pdf]

| <b>Supplemental digital content Table 1. Characteristics of patients with bacteremia and contaminated blood cultures</b> |                  |                  |                                                                              |                                  |                                           |                                                                                       |                                                 |
|--------------------------------------------------------------------------------------------------------------------------|------------------|------------------|------------------------------------------------------------------------------|----------------------------------|-------------------------------------------|---------------------------------------------------------------------------------------|-------------------------------------------------|
| <b>Case</b>                                                                                                              | <b>Age (mos)</b> | <b>LOS (hrs)</b> | <b>Organism</b>                                                              | <b>Penicillin Susceptibility</b> | <b>Initial Antibiotic</b>                 | <b>Blood Culture Directed Changes in Management</b>                                   | <b>Discharge Antibiotic</b>                     |
| 1                                                                                                                        | 2.1              | 172              | <i>Staphylococcus aureus</i> (MSSA) <sup>e</sup>                             | N/A                              | Clindamycin                               | Broadened to vancomycin and then narrowed to 1 <sup>st</sup> generation cephalosporin | 1 <sup>st</sup> generation cephalosporin        |
| 2                                                                                                                        | 3.4              | 226              | <i>Staphylococcus aureus</i> (MRSA) <sup>e</sup>                             | N/A                              | Ceftriaxone                               | Broadened by adding clindamycin                                                       | Clindamycin & 3rd generation cephalosporin (IV) |
| 3                                                                                                                        | 4.7              | 51               | Alpha streptococcus (not <i>S. pneumoniae</i> or <i>Enterococcus spp.</i> )* | N/A                              | Ampicillin                                | Broadened to ceftriaxone                                                              | Penicillin/amoxicillin                          |
| 4                                                                                                                        | 6.4              | 73               | <i>Streptococcus pneumoniae</i>                                              | R                                | Ceftriaxone                               | Broadened to linezolid and levofloxacin                                               | Amoxicillin-clavulanate & levofloxacin          |
| 5                                                                                                                        | 8.1              | 95               | <i>Streptococcus pneumoniae</i>                                              | S                                | Ceftriaxone                               | Narrowed to amoxicillin                                                               | Amoxicillin-clavulanate                         |
| 6                                                                                                                        | 9.6              | 237              | <i>Staphylococcus aureus</i> (MSSA)                                          | N/A                              | Vancomycin                                | No changes made                                                                       | 1 <sup>st</sup> generation cephalosporin (IV)   |
| 7                                                                                                                        | 12.3             | 58               | <i>Streptococcus pneumoniae</i>                                              | S                                | Ceftriaxone                               | No changes made                                                                       | Amoxicillin-clavulanate                         |
| 8                                                                                                                        | 13.3             | 367              | <i>Haemophilus influenza</i> (beta-lactamase negative)                       | S                                | Ceftriaxone, metronidazole and vancomycin | Narrowed to 3 <sup>rd</sup> generation cephalosporin                                  | None                                            |
| 9                                                                                                                        | 13.8             | 130              | <i>Streptococcus pneumoniae</i> <sup>a,b,d</sup>                             | S                                | Clindamycin, vancomycin, and ceftriaxone  | No changes made                                                                       | Vancomycin & 3rd generation cephalosporin (IV)  |
| 10                                                                                                                       | 14.3             | 1454             | <i>Staphylococcus aureus</i> (MRSA) <sup>a,b,c</sup>                         | N/A                              | Vancomycin and ceftriaxone                | No changes made                                                                       | Vancomycin (IV)                                 |
| 11                                                                                                                       | 14.9             | 84               | <i>Streptococcus</i>                                                         | Not reported                     | Vancomycin                                | Narrowed to 3 <sup>rd</sup>                                                           | Penicillin/amoxicillin                          |

| <b>Supplemental digital content Table 1. Characteristics of patients with bacteremia and contaminated blood cultures</b> |                  |                  |                                                  |                                  |                             |                                                      |                                                        |
|--------------------------------------------------------------------------------------------------------------------------|------------------|------------------|--------------------------------------------------|----------------------------------|-----------------------------|------------------------------------------------------|--------------------------------------------------------|
| <b>Case</b>                                                                                                              | <b>Age (mos)</b> | <b>LOS (hrs)</b> | <b>Organism</b>                                  | <b>Penicillin Susceptibility</b> | <b>Initial Antibiotic</b>   | <b>Blood Culture Directed Changes in Management</b>  | <b>Discharge Antibiotic</b>                            |
|                                                                                                                          |                  |                  | <i>pneumoniae</i> <sup>a,b</sup>                 |                                  |                             | generation cephalosporin                             |                                                        |
| 12                                                                                                                       | 15.1             | 335              | <i>Streptococcus pneumoniae</i> <sup>a,e</sup>   | S                                | Ceftriaxone and vancomycin  | Narrowed to 3 <sup>rd</sup> generation cephalosporin | 3 <sup>rd</sup> generation cephalosporin               |
| 13                                                                                                                       | 15.6             | 382              | <i>Streptococcus pneumoniae</i> <sup>a,b</sup>   | Not reported                     | Vancomycin                  | Narrowed to 3 <sup>rd</sup> generation cephalosporin | 3 <sup>rd</sup> generation cephalosporin               |
| 14                                                                                                                       | 19.6             | 14               | <i>Abiotrophia species</i> *                     | N/A                              | Ceftriaxone                 | No changes made                                      | Penicillin/amoxicillin                                 |
| 15                                                                                                                       | 21.3             | 116              | Coagulase negative staphylococcus*               | N/A                              | Ampicillin                  | Broadened to clindamycin and ceftriaxone             | 3 <sup>rd</sup> generation cephalosporin               |
| 16                                                                                                                       | 21.7             | 211              | <i>Streptococcus pneumoniae</i> <sup>a,d,e</sup> | R                                | Clindamycin and ceftriaxone | Broadened to linezolid                               | Levofloxacin                                           |
| 17                                                                                                                       | 22.2             | 182              | <i>Streptococcus pneumoniae</i> <sup>a,b</sup>   | Not reported                     | Cefuroxime and vancomycin   | Narrowed to 2 <sup>nd</sup> generation cephalosporin | 2 <sup>nd</sup> generation cephalosporin               |
| 18                                                                                                                       | 22.5             | 280              | Coagulase negative staphylococcus*               | R                                | Ceftriaxone                 | Broadened by adding vancomycin and azithromycin      | None                                                   |
| 19                                                                                                                       | 23.3             | 239              | <i>Streptococcus pneumoniae</i>                  | S                                | Ceftriaxone                 | Broadened by adding clindamycin                      | Clindamycin                                            |
| 20                                                                                                                       | 24.1             | 66               | <i>Streptococcus pneumoniae</i>                  | S                                | Ampicillin                  | No changes made                                      | Penicillin/amoxicillin                                 |
| 21                                                                                                                       | 25.1             | 314              | <i>Streptococcus pneumoniae</i> <sup>e</sup>     | I                                | Ceftriaxone                 | Broadened by adding clindamycin                      | Clindamycin & 3 <sup>rd</sup> generation cephalosporin |
| 22                                                                                                                       | 27.8             | 44               | <i>Streptococcus pneumoniae</i>                  | S                                | Ceftriaxone                 | No changes made                                      | Amoxicillin-clavulanate                                |
| 23                                                                                                                       | 31.9             | 165              | <i>Streptococcus pneumoniae</i>                  | R                                | Ceftriaxone                 | Broadened to                                         | Vancomycin (IV)                                        |

| <b>Supplemental digital content Table 1. Characteristics of patients with bacteremia and contaminated blood cultures</b> |                  |                  |                                                     |                                  |                                          |                                                     |                                                        |
|--------------------------------------------------------------------------------------------------------------------------|------------------|------------------|-----------------------------------------------------|----------------------------------|------------------------------------------|-----------------------------------------------------|--------------------------------------------------------|
| <b>Case</b>                                                                                                              | <b>Age (mos)</b> | <b>LOS (hrs)</b> | <b>Organism</b>                                     | <b>Penicillin Susceptibility</b> | <b>Initial Antibiotic</b>                | <b>Blood Culture Directed Changes in Management</b> | <b>Discharge Antibiotic</b>                            |
|                                                                                                                          |                  |                  |                                                     |                                  |                                          | vancomycin                                          |                                                        |
| 24                                                                                                                       | 55.6             | 550              | Coagulase negative staphylococcus*                  | N/A                              | Clindamycin and ceftriaxone              | No changes made                                     | None                                                   |
| 25                                                                                                                       | 55.9             | 59               | <i>Streptococcus pneumoniae</i>                     | S                                | Ceftriaxone                              | No changes made                                     | 3 <sup>rd</sup> generation cephalosporin               |
| 26                                                                                                                       | 60.3             | 46               | Coagulase negative staphylococcus*                  | NA                               | Clindamycin and ceftriaxone              | No changes made                                     | Clindamycin & 3 <sup>rd</sup> generation cephalosporin |
| 27                                                                                                                       | 62.7             | 39               | <i>Bacillus species</i> (not anthracis)*            | N/A                              | Ceftriaxone                              | No changes made                                     | 3 <sup>rd</sup> generation cephalosporin               |
| 28                                                                                                                       | 68.2             | 115              | <i>Streptococcus pneumoniae</i>                     | S                                | Ceftriaxone                              | No changes made                                     | 3 <sup>rd</sup> generation cephalosporin               |
| 29                                                                                                                       | 81.8             | 63               | <i>Micrococcus luteus</i> *                         | N/A                              | Ampicillin and azithromycin              | No changes made                                     | Penicillin/amoxicillin & azithromycin                  |
| 30                                                                                                                       | 109.2            | 191              | <i>Staphylococcus aureus</i> (MRSA) <sup>c, e</sup> | N/A                              | Azithromycin                             | Broadened by adding ceftriaxone and vancomycin      | Clindamycin                                            |
| 31                                                                                                                       | 125.7            | 53               | <i>Streptococcus pneumoniae</i>                     | S                                | Ampicillin                               | Broadened to amoxicillin-clavulanate                | Amoxicillin-clavulanate                                |
| 32                                                                                                                       | 129.7            | 69               | <i>Streptococcus pneumoniae</i>                     | S                                | Ampicillin                               | No changes made                                     | Penicillin/amoxicillin                                 |
| 33                                                                                                                       | 156.9            | 179              | <i>Staphylococcus aureus</i> <sup>c</sup> (MSSA)    | N/A                              | Ceftriaxone, vancomycin, and clindamycin | Narrowed to oxacillin                               | Oxacillin (IV)                                         |
| 34                                                                                                                       | 202.8            | 114              | <i>Streptococcus pneumoniae</i>                     | S                                | Ceftriaxone                              | Broadened by adding azithromycin and vancomycin     | Penicillin/amoxicillin                                 |

\*Determined to be contaminants

<sup>a</sup>Underwent pleural drainage procedure

<sup>b</sup>Initial complicated pneumonia

<sup>c</sup>Metastatic complications

<sup>d</sup>pleural fluid positive

<sup>e</sup>Presented with uncomplicated pneumonia and evolved to complicated pneumonia
