# Supplementary material
Source: PubMed Central journal article supplement (PMC3907948)
Supplement: NIHMS546777-supplement-2.pdf [file NIHMS546777-supplement-2.pdf]

| <b>Supplemental digital content<br/>TABLE 2.<br/>Clinical factors associated with bacteremia</b> | <b>Total Population</b> | <b>Bacteremia</b> | <b>Culture Negative</b> | <b>P Bacteremia vs Neg</b> | <b>No Blood Culture</b> | <b>P Bacteremia vs No Culture</b> |
|--------------------------------------------------------------------------------------------------|-------------------------|-------------------|-------------------------|----------------------------|-------------------------|-----------------------------------|
| <b>N (%)</b>                                                                                     | 658                     | 26 (4.0)          | 343 (52.1)              |                            | 289 (43.9)              |                                   |
| <b>Age</b>                                                                                       |                         |                   |                         |                            |                         |                                   |
| < 1 year                                                                                         | 112 (17)                | 5 (19.2)          | 58 (16.9)               | 0.66                       | 49 (17)                 | 0.82                              |
| 1-5 years                                                                                        | 354 (53.8)              | 16 (61.5)         | 179 (52.2)              |                            | 159 (55)                |                                   |
| >5-12 years                                                                                      | 156 (23.7)              | 4 (15.4)          | 88 (25.7)               |                            | 64 (22.1)               |                                   |
| >12 years                                                                                        | 36 (5.5)                | 1 (3.8)           | 18 (5.2)                |                            | 17 (5.9)                |                                   |
| <b>Male</b>                                                                                      | 356 (54.1)              | 17 (65.4)         | 187 (54.5)              | 0.28                       | 152 (52.6)              | 0.21                              |
| <b>Race</b>                                                                                      |                         |                   |                         |                            |                         |                                   |
| Non-Hispanic White                                                                               | 368 (55.9)              | 15 (57.7)         | 195 (56.9)              | 0.60                       | 158 (54.7)              | 0.45                              |
| Non-Hispanic Black                                                                               | 108 (16.4)              | 2 (7.7)           | 50 (14.6)               |                            | 56 (19.4)               |                                   |
| Hispanic                                                                                         | 65 (9.9)                | 4 (15.4)          | 33 (9.6)                |                            | 28 (9.7)                |                                   |
| Asian                                                                                            | 19 (2.9)                |                   | 12 (3.5)                |                            | 7 (2.4)                 |                                   |
| Other                                                                                            | 98 (14.9)               | 5 (19.2)          | 53 (15.5)               |                            | 40 (13.8)               |                                   |
| <b>Insurance</b>                                                                                 |                         |                   |                         |                            |                         |                                   |
| State/self pay                                                                                   | 350 (53.2)              | 14 (53.8)         | 181 (52.8)              | 0.92                       | 155 (53.6)              | 0.98                              |
| Commercial                                                                                       | 308 (46.8)              | 12 (46.2)         | 162 (47.2)              |                            | 134 (46.4)              |                                   |
| <b>LOS (hours)†</b>                                                                              | 52 [38, 91]             | 168.5 [73, 237]   | 54 [38, 101]            | <.0001                     | 48 [37, 78]             | <.0001                            |
| <b>Oxygen duration (hours)†</b>                                                                  | 32 [15, 66]             | 66 [24, 113]      | 34 [15, 76.5]           | 0.07                       | 31 [13, 59]             | 0.02                              |
| <b>WBC count (1000/microliter)†</b>                                                              | 13.7 [9.1, 20.1]        | 16.5 [9.7, 27.4]  | 13.5 [9.4, 19.8]        | 0.18                       | 13.6 [8.8, 19.9]        | 0.15                              |
| <b>CRP (mg/dl)†</b>                                                                              | 7.9 [2.6, 19.6]         | 20.3 [9.2, 32.2]  | 6.7 [2.4, 19]           | 0.01                       | 8.8 [2.4, 16.8]         | 0.01                              |
| <b>ESR (mm/hr)†</b>                                                                              | 49.5 [30, 83]           | 78.5 [38, 107]    | 50.5 [29.5, 85]         | 0.34                       | 43.5 [25, 64]           | 0.22                              |
| <b>Duration of</b>                                                                               |                         |                   |                         |                            |                         |                                   |

|                                                                                    |            |           |            |        |            |        |
|------------------------------------------------------------------------------------|------------|-----------|------------|--------|------------|--------|
| <b>illness prior to admission</b>                                                  |            |           |            |        |            |        |
| < 24 hours                                                                         | 44 (6.7)   | 1 (3.8)   | 19 (5.5)   | 0.84   | 24 (8.3)   | 0.45   |
| ≥ 24 -48 hours                                                                     | 94 (14.3)  | 3 (11.5)  | 40 (11.7)  |        | 51 (17.6)  |        |
| > 48- 72 hours                                                                     | 91 (13.8)  | 2 (7.7)   | 46 (13.4)  |        | 43 (14.9)  |        |
| > 72 hours                                                                         | 421 (64)   | 20 (76.9) | 233 (67.9) |        | 168 (58.1) |        |
| <b>Unknown</b>                                                                     | 8 (1.2)    |           | 5 (1.5)    |        | 3 (1)      |        |
| <b>Duration of fever prior to admission</b>                                        |            |           |            |        |            |        |
| < 24 hours                                                                         | 95 (14.4)  | 3 (11.5)  | 52 (15.2)  | 0.23   | 40 (13.8)  | <0.006 |
| ≥ 24 -48 hours                                                                     | 99 (15)    | 3 (11.5)  | 51 (14.9)  |        | 45 (15.6)  |        |
| > 48- 72 hours                                                                     | 69 (10.5)  | 5 (19.2)  | 39 (11.4)  |        | 25 (8.7)   |        |
| > 72 hours                                                                         | 270 (41)   | 15 (57.7) | 158 (46.1) |        | 97 (33.6)  |        |
| <b>Unknown</b>                                                                     | 125 (19)   |           | 43 (12.5)  |        | 82 (28.4)  |        |
| <b>Outpatient visit for respiratory illness &lt;2 weeks prior to CAP diagnosis</b> |            |           |            |        |            |        |
| <b>Pneumonia diagnosis</b>                                                         | 92 (35.8)  | 3 (30)    | 55 (38.7)  | 0.58   | 34 (32.4)  | 0.88   |
| <b>Other Respiratory**</b>                                                         | 165 (64.2) | 7 (70)    | 87 (61.3)  |        | 71 (67.6)  |        |
| <b>Antibiotic therapy for LRI or pneumonia prior to admission</b>                  | 134 (20.4) | 5 (19.2)  | 72 (21)    | 0.83   | 57 (19.7)  | 0.95   |
| <b>Pneumonia complications</b>                                                     |            |           |            |        |            |        |
| <b>Uncomplicated</b>                                                               | 601 (91.3) | 19 (73.1) | 306 (89.2) | <0.001 | 276 (95.5) | <0.001 |

|                                  |           |          |           |      |          |      |
|----------------------------------|-----------|----------|-----------|------|----------|------|
| <b>pneumonia</b>                 |           |          |           |      |          |      |
| <b>Complicated pneumonia§</b>    | 51 (7.8)  | 4 (15.4) | 36 (10.5) |      | 11 (3.8) |      |
| <b>Metastatic complications±</b> | 6 (0.9)   | 3 (11.5) | 1 (0.3)   |      | 2 (0.7)  |      |
| <b>PICU admission</b>            | 78 (11.9) | 6 (23.1) | 48 (14)   | 0.21 | 24 (8.3) | 0.01 |

†Median and IQR are provided for continuous variables.

\*\* URI, asthma/reactive airways, bronchiolitis, other respiratory illness, and unknown respiratory illness

§Patients with complicated pneumonia at presentation including those with or without extrapulmonary complications: SIRS, cardiovascular dysfunction, neurologic dysfunction, hematologic dysfunction, renal dysfunction, and hepatic dysfunction.

± Metastatic complications included pyomyositis, septic arthritis, osteomyelitis, and abscess with or without complicated pneumonia.
